# Supplementary material for: A human-specific VNTR in the TRIB3 promoter causes gene expression variation between individuals
Source: PLoS Genet. 2020 Aug 3;16(8):e1008981. doi: 10.1371/journal.pgen.1008981 (PMC7425993; doi:10.1371/journal.pgen.1008981)
Supplement: S1 Dataset — (XLSX) [file pgen.1008981.s003.xlsx]

## Sheet: Sheet1
S1 Dataset. Numerical data.
Fig.3	Luciferase reporter assays
A
			untreated					Mean	Std. Deviation	p-value	Holm-Bonferroni correction
			repl. 1	repl. 2	repl. 3	repl. 4				2x33 vs. 5x33
	pGL3-Basic		1.29305	1.06902	0.940739	0.697188		1	0.248898
	TRIB3-2x33-pGL3		6.3005	5.96217	8.96591	9.582		7.70265	1.83694
	TRIB3-5x33-pGL3		10.8911	9.24391	9.92391	11.4453		10.3761	0.982309	0.0440743	0.0440743
			tunicamycin					Mean	Std. Deviation	p-value	Holm-Bonferroni correction
			repl. 1	repl. 2	repl. 3	repl. 4				2x33 vs. 5x33
	pGL3-Basic		1.1038	1.03657	0.92427	0.935353		1	0.0856878
	TRIB3-2x33-pGL3		82.5154	70.8942	98.0468	84.5039		83.9901	11.1285
	TRIB3-5x33-pGL3		138.55	113.887	114.38	120.542		121.84	11.5439	0.0196637	0.0393275
			arsenite					Mean	Std. Deviation	p-value	Holm-Bonferroni correction
			repl. 1	repl. 2	repl. 3	repl. 4				2x33 vs. 5x33
	pGL3-Basic		0.940133	0.916186	1.09268	1.051		1	0.0852442
	TRIB3-2x33-pGL3		33.0575	23.0131	25.9083	31.3384		28.3293	4.67385
	TRIB3-5x33-pGL3		82.5745	66.4056	59.4992	57.4662		66.4864	11.3874	0.00517234	0.015517
			glucose deprivation					Mean	Std. Deviation	p-value	Holm-Bonferroni correction
			repl. 1	repl. 2	repl. 3	repl. 4				2x33 vs. 5x33
	pGL3-Basic		1.0409	1.02537	1.02981	0.903923		1	0.0643831
	TRIB3-2x33-pGL3		43.5517	33.0955	37.2361	33.9015		36.9462	4.75446
	TRIB3-5x33-pGL3		64.6132	51.6858	49.9009	48.219		53.6047	7.47425	0.00325471	0.0130189
B	untreated		repl. 1	repl. 2	repl. 3	repl. 4
		pGL3-Basic	0.953778	1.00293	0.916361	1.12693
		1x33	8.36154	8.75786	9.71577	7.55664		linear model p value
		2x33	12.8646	12.1101	14.3555	13.2822		1.48e-06
		3x33	16.8777	14.774	17.2442	16.5169
		4x33	16.2615	14.5593	24.4852	17.3717
		5x33	20.7138	18.0512	26.6938	17.8496
	arsenite		repl. 1	repl. 2	repl. 3	repl. 4
		pGL3-Basic	0.860085	0.847163	1.05229	1.24046
		1x33	12.6967	11.5634	12.7233	11.2165		linear model p value
		2x33	37.5568	32.3089	32.8377	28.0176		4.45e-11
		3x33	44.8798	44.1606	47.3715	46.5944
		4x33	53.3831	47.2378	53.3722	51.7129
		5x33	58.508	60.2564	61.9202	54.9759
	ATF4-pCG		repl. 1	repl. 2	repl. 3	repl. 4
		pGL3-Basic	0.875456	1.12454	1.12454	0.875456
		1x33	20.7619	23.614	23.3049	19.858		linear model p value
		2x33	54.7711	54.469	68.6905	48.6467		1.81e-11
		3x33	74.1857	71.0215	74.5146	74.0484
		4x33	83.1917	78.9511	81.5139	90.2755
		5x33	110.095	98.3056	96.9032	100.041
